# Supplementary material for: Silicone–barium titanate composites with increased electromechanical sensitivity. The effects of the filler morphology
Source: Royal Society of Chemistry journal article supplement (doi:10.1039/c4ra09903f), 2014-01-01
Supplement: c4ra09903f1.pdf [file c4ra09903f1.pdf]

## Supplementary information

### Silicone-barium titanate composites with increased electromechanical sensitivity. The effects of the filler morphology

Adrian Bele, Maria Cazacu, George-Theodor Stiubianu, Stelian Vlad

*“Petru Poni” Institute of Macromolecular Chemistry, Aleea Gr. Ghica Voda 41A, Iasi 700487,*

*Romania*

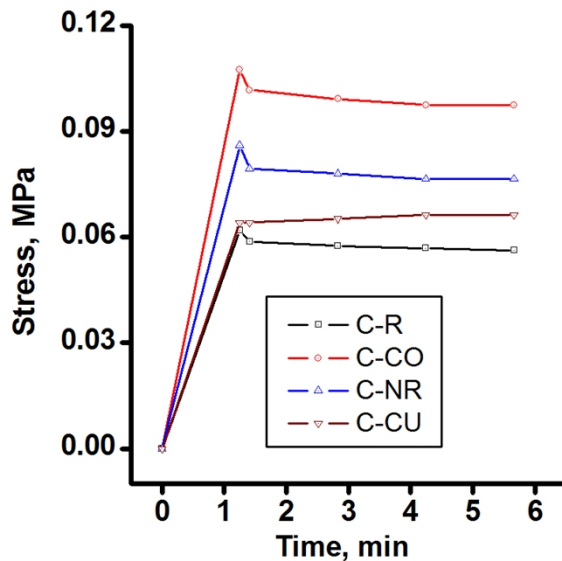

Figure 1ESI. Stress relaxation for tested samples

Table 1ESI. Permanent set for tested samples

| Sample | Stress, MPa | Strain, % |
|--------|-------------|-----------|
| C-R    | 0.01967     | 20        |
| C-CO   | 0.02424     | 10        |
| C-NR   | 0.02437     | 12.5      |
| C-CU   | 0.03486     | 12.8      |

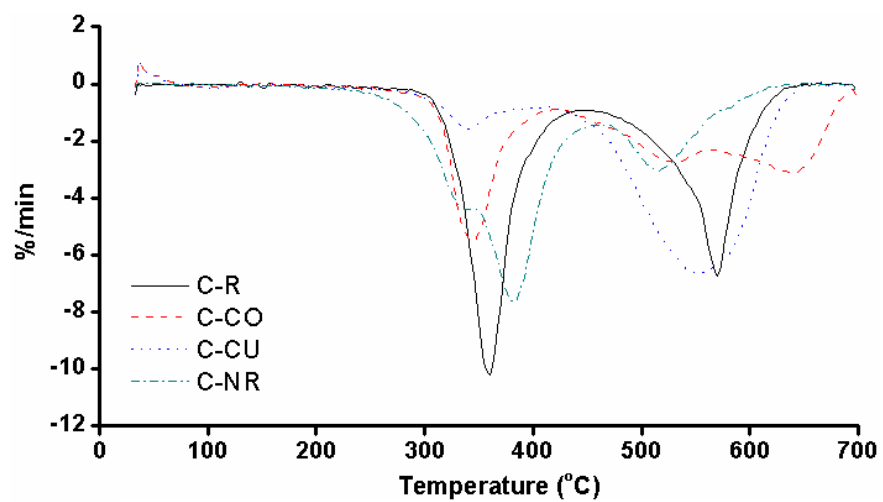

**Figure 2ESI.** DTG curves registered for the prepared composites and reference sample.

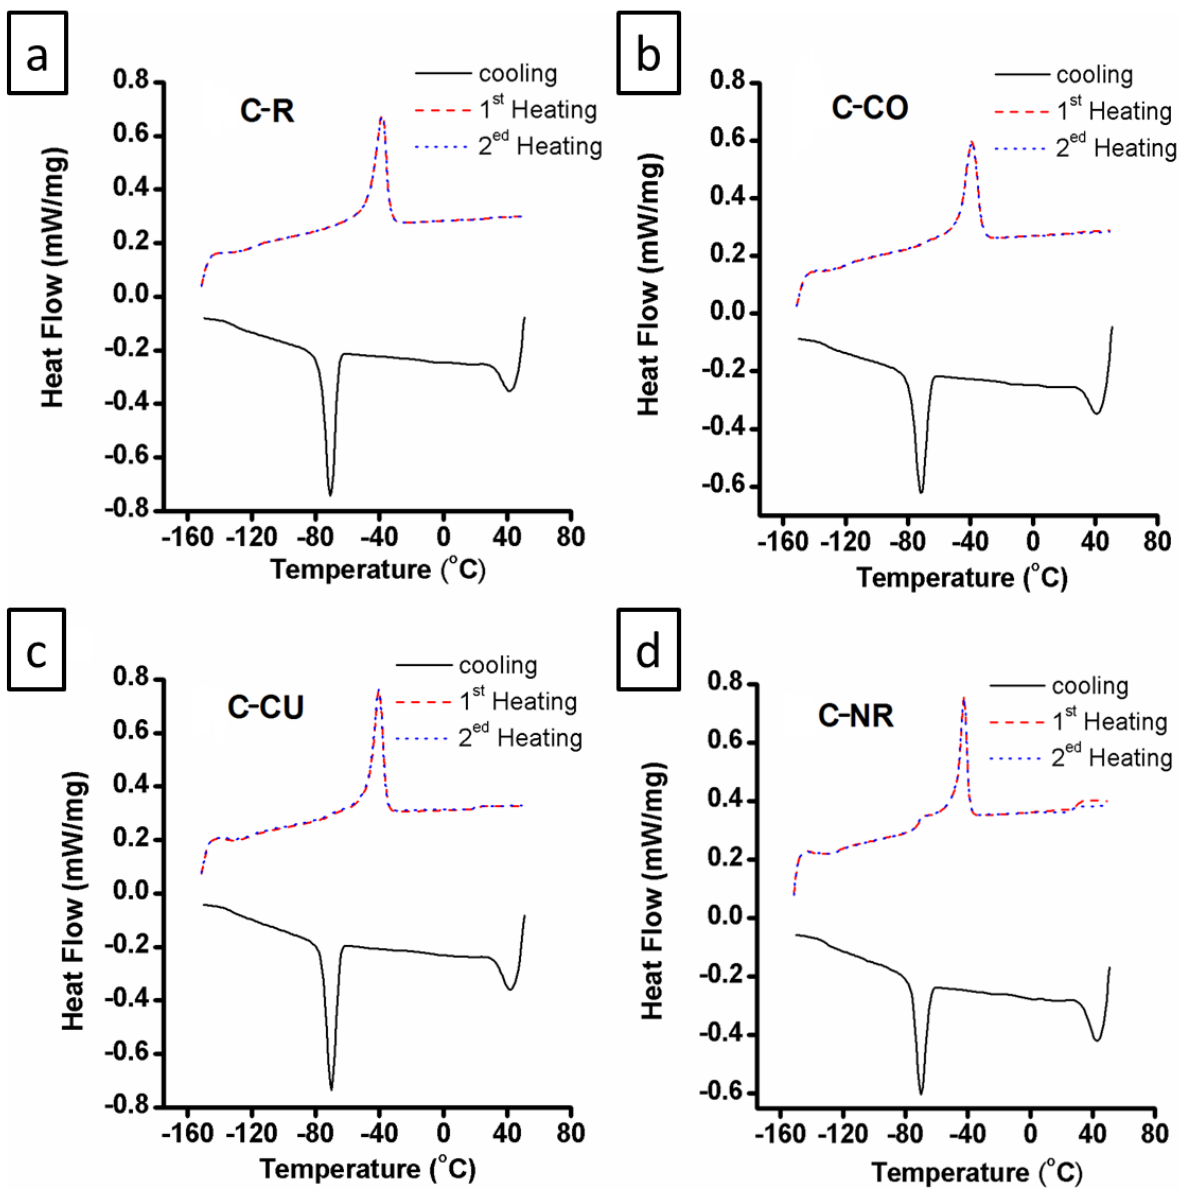

Figure 3ESI. DSC curves for the prepared composites as compared with reference sample.
